# Supplementary material for: A facile approach to prepare porphyrinic porous aromatic frameworks for small hydrocarbon separation
Source: Royal Society of Chemistry journal article supplement (doi:10.1039/c4ta00984c), 2014-01-01
Supplement: c4ta00984c1.pdf [file c4ta00984c1.pdf]

## Supporting Information

### A Facile Approach to Prepare Porphyrinic Porous Aromatic Frameworks for Small Hydrocarbons Separation

*Shuang Meng, Heping Ma, Lingchang Jiang, Hao Ren, and Guangshan Zhu\**

**Table S1.** Raw material input and yield of PAFs

**Fig S1** FT-IR spectra of PAF-40 and the monomer

**Fig S2** FT-IR spectra of PAF-40-Fe and the monomer

**Fig S3** FT-IR spectra of PAF-40-Fe and the monomer

**Table S2.** Elemental analysis and ICP for PAFs

**Fig S4.** Powder X-ray diffraction of PAFs

**Fig S5.** Solid-state  $^{13}\text{C}$  NMR of PAF-40

**Fig S6.** Solid-state  $^{13}\text{C}$  NMR of PAF-40-Fe

**Fig S7.** Solid-state  $^{13}\text{C}$  NMR of PAF-40-Mn

**Fig S8.**  $\text{CH}_4$ ,  $\text{C}_2\text{H}_4$ ,  $\text{C}_2\text{H}_6$  and  $\text{C}_3\text{H}_8$  adsorption isotherms of PAF-40 at 273 k

**Fig S9.**  $\text{CH}_4$ ,  $\text{C}_2\text{H}_4$ ,  $\text{C}_2\text{H}_6$  and  $\text{C}_3\text{H}_8$  adsorption isotherms of PAF-40-Fe at 273 k

**Fig S10.**  $\text{CH}_4$ ,  $\text{C}_2\text{H}_4$ ,  $\text{C}_2\text{H}_6$  and  $\text{C}_3\text{H}_8$  adsorption isotherms of PAF-40-Mn at 273 k

**Fig S11.** Calculation of isotherms heat of  $\text{CH}_4$  for PAF-40-Mn materials

**Fig S12.** Calculation of  $\text{C}_2\text{H}_4/\text{CH}_4$ ,  $\text{C}_2\text{H}_6/\text{CH}_4$  and  $\text{C}_3\text{H}_8/\text{CH}_4$  selectivity for PAF-40 materials by IAST theory

**Fig S13.** IAST-predicted adsorption selectivity of PAF-40 at 273K and 110kPa.

**Fig S14.** IAST-predicted adsorption selectivity of PAF-40-Fe at 273K and 110kPa.

**Fig S15.** IAST-predicted adsorption selectivity of PAF-40-Mn at 273K and 110kPa.

**Table S3.** Summary of small hydrocarbons adsorption in porous materials

**Table S1.** Raw material input of PAFs

| Materials | Monomer                                                 | Catalyst                             | Reaction Conditions                   | Yield (%) |
|-----------|---------------------------------------------------------|--------------------------------------|---------------------------------------|-----------|
| PAF-40    | 5,10,15,20-Tetraphenylporphyrin<br>(385mg, 0.62mmol)    |                                      |                                       | 82%       |
| PAF-40-Fe | 5,10,15,20-Tetraphenylporphyrin-Fe<br>(400mg, 0.6mmol)  | AlCl <sub>3</sub><br>(1.6g, 4.5mmol) | CHCl <sub>3</sub> , 40mL<br>60°C, 42h | 78%       |
| PAF-40-Mn | 5,10,15,20-Tetraphenylporphyrin-Mn<br>(440mg, 0.66mmol) |                                      |                                       | 80%       |

5,10,15,20-Tetraphenylporphyrin (385mg, 0.62 mmol) and AlCl<sub>3</sub> (1.600 g, 4.5 mmol) was put into a 100 mL 2-neck dried flask. Then a condenser and a magnetic stirring bar was added into the flask. After degassing by Ar gas, dried CHCl<sub>3</sub> (40 mL) was added to the flask and the mixture was heated to 60 °C for 42 h under an inert atmosphere. After cooling to room temperature, the crude product was collected by filtration and washed with ethanol, HCl (3 M) and methanol. Further purification of PAF-40 was carried out by Soxhlet extraction with methanol and THF for 24 h, respectively. The product was dried in vacuum at 120 °C to give PAF-40 in black powder.

Synthesis of PAF-40-Mn and PAF-40-Fe are in a similar procedure.

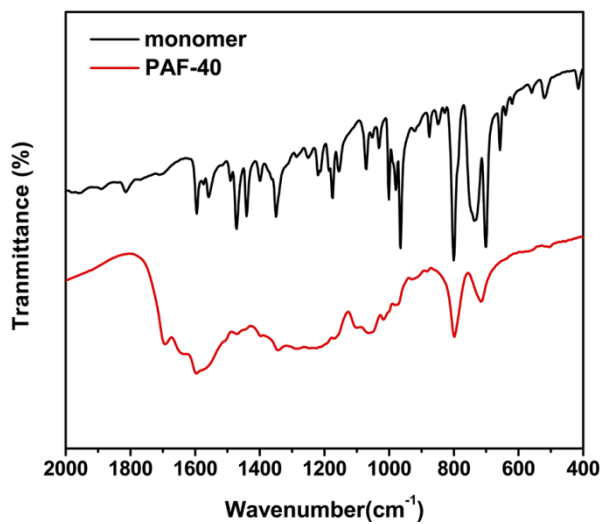

**Figure S1.** FTIR spectra of monomer (black) and PAF-40 (red).

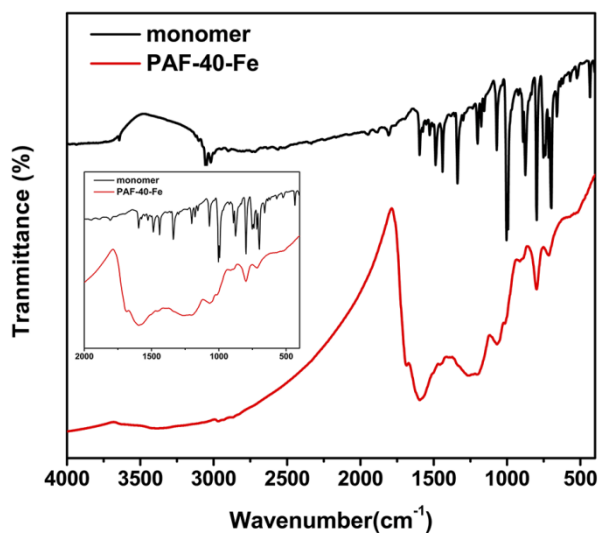

**Figure S2.** FTIR spectra of monomer (black) and PAF-40-Fe (red).

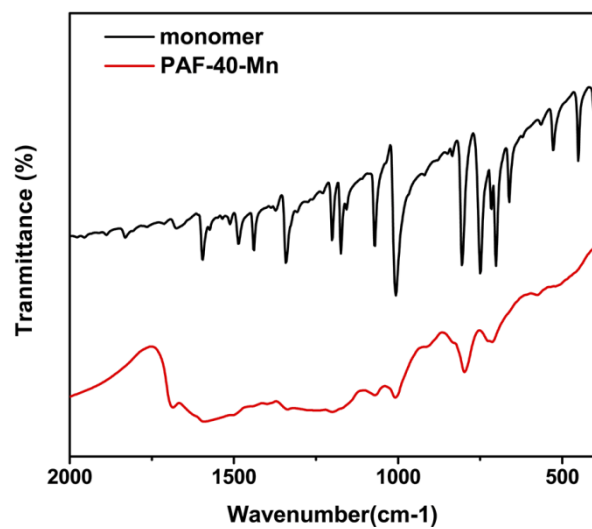

**Figure S3.** FTIR spectra of monomer (black), PAF-40-Mn (red).

**Table S2.** Elemental analysis of the PAF-40, PAF-40-Fe, PAF-40-Mn. Fe, Mn and Al contents were determined by ICP.

The measurements of the ICP and elemental analysis on PAF-40s were carried out in order to confirm the composition of the residue in the polymer. Prior to the tests, all products were washed with HCl (1M) and ethanol thoroughly. After that, the samples were dried in the vacuum at 150 °C for 12 h. At this time, approximately 94% of the elements contained in the PAF networks are determined by three parallel measurements, and the remaining amounts undetected are likely to be chlorine element.

| <b>Materials</b> | C (wt %) | H (wt %) | N (wt %) | Fe (wt %) | Mn (wt %) | Al (wt %) |
|------------------|----------|----------|----------|-----------|-----------|-----------|
| PAF-40           | 80.16    | 4.186    | 7.95     |           |           | 1.475     |
| PAF-40           | 80.76    | 4.061    | 8.04     |           |           | 1.475     |
| PAF-40           | 79.36    | 4.043    | 7.83     |           |           | 1.475     |
| PAF-40-Fe        | 78.65    | 4.126    | 7.95     | 2.08      |           | 1.34      |
| PAF-40-Fe        | 78.83    | 4.043    | 7.87     | 2.08      |           | 1.34      |
| PAF-40-Fe        | 77.28    | 4.017    | 7.83     | 2.08      |           | 1.34      |
| PAF-40-Mn        | 78.37    | 4.179    | 7.44     |           | 1.86      | 1.28      |
| PAF-40-Mn        | 79.43    | 4.123    | 7.53     |           | 1.86      | 1.28      |
| PAF-40-Mn        | 78.29    | 4.075    | 7.42     |           | 1.86      | 1.28      |

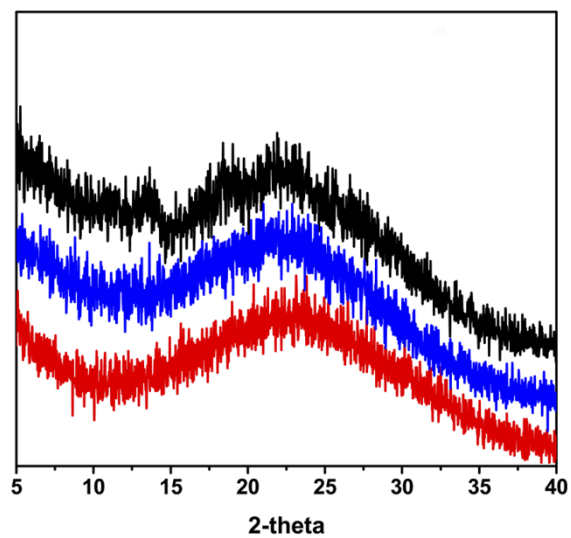

**Figure S4.** PXR D patterns of synthesized PAF-40 (black), PAF-40-Fe (red), and PAF-40-Mn (blue).

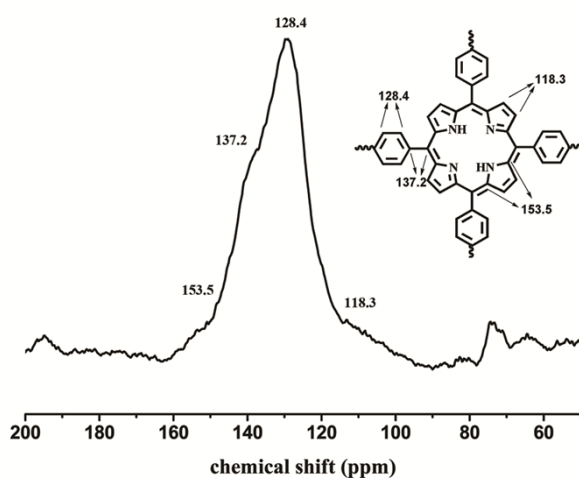

**Figure S5.** Solid-state  $^{13}\text{C}$  NMR of PAF-40.

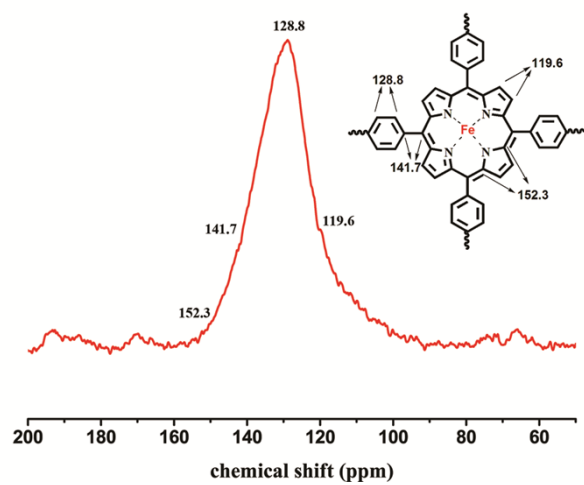

**Figure S6.** Solid-state  $^{13}\text{C}$  NMR of PAF-40-Fe.

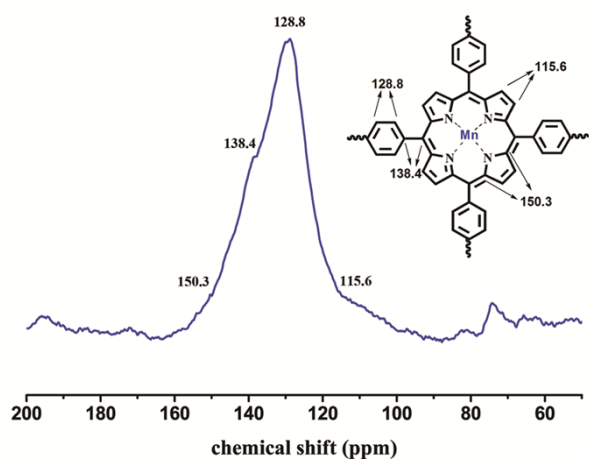

**Figure S7.** Solid-state  $^{13}\text{C}$  NMR of PAF-40-Mn.

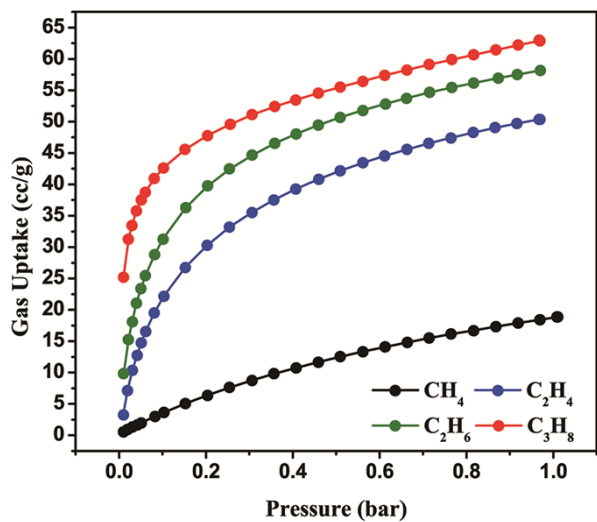

**Figure S8.** CH<sub>4</sub>, C<sub>2</sub>H<sub>4</sub>, C<sub>2</sub>H<sub>6</sub> and C<sub>3</sub>H<sub>8</sub> adsorption isotherms of PAF-40 at 273 K.

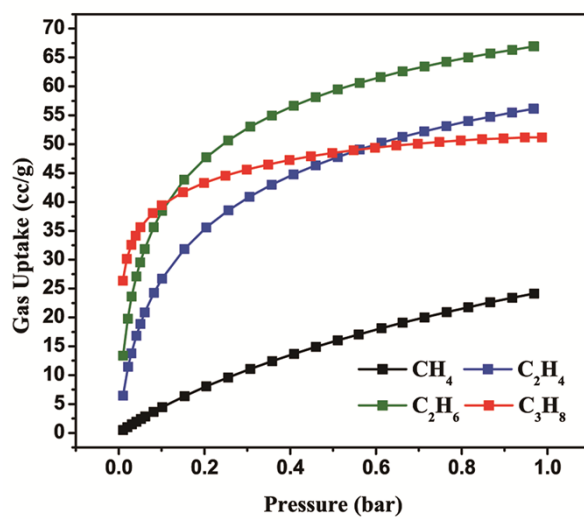

**Figure S9.** CH<sub>4</sub>, C<sub>2</sub>H<sub>4</sub>, C<sub>2</sub>H<sub>6</sub> and C<sub>3</sub>H<sub>8</sub> adsorption isotherms of PAF-40-Fe at 273 K.



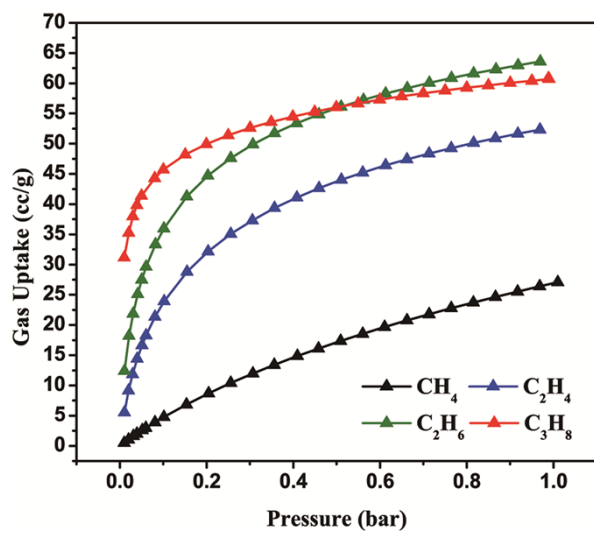

**Figure S10.** CH<sub>4</sub>, C<sub>2</sub>H<sub>4</sub>, C<sub>2</sub>H<sub>6</sub> and C<sub>3</sub>H<sub>8</sub> adsorption isotherms of PAF-40-Mn at 273 k.

## Calculation of isosteric heat of adsorption

The CH<sub>4</sub> isosteric heat of adsorption of PAF-40 was calculated as a function of the adsorption isotherms at 273K and 298K. The data were modelled with a virial-type expression composed of parameters  $a_i$  and  $b_i$  (eq 1), and the heat of adsorption was calculated from the fitting parameters using eq 2, where  $P$  is the pressure,  $N$  is the amount adsorbed,  $T$  is the temperature,  $R$  is the universal gas constant, and  $m$  and  $n$  determine the number of terms required to adequately describe the isotherm.  $a_i$  and  $b_i$  are virial coefficients.

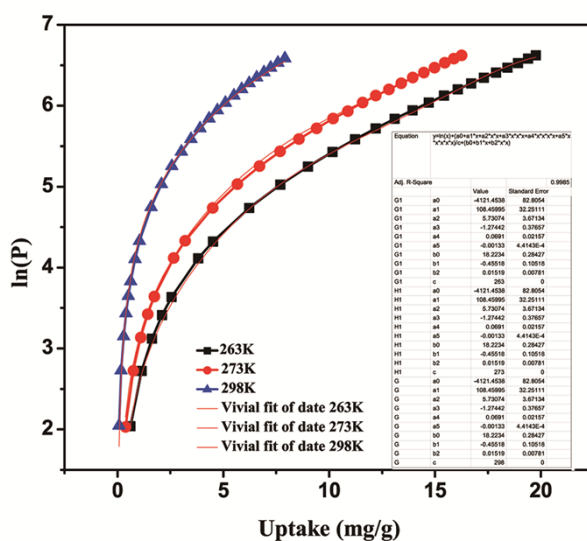

**Figure S11.** The plots of pressures in function of gas uptakes and the parameters (Virial-type expression) for the calculation of heats of adsorption of CH<sub>4</sub> for PAF-40-Mn..

Calculation of isotherms heat for other small hydrocarbons for PAF-40, PAF-40-Mn and PAF-40-Fe is a similar procedure.

## Calculation of CH<sub>4</sub>-C<sub>2</sub>H<sub>4</sub>, CH<sub>4</sub>-C<sub>2</sub>H<sub>6</sub> and CH<sub>4</sub>-C<sub>3</sub>H<sub>8</sub> Selectivity for PAF-40 by IAST theory.

The adsorption isotherms for pure CH<sub>4</sub> and C<sub>2</sub>H<sub>4</sub>, measured at 273 K were first converted to absolute loadings according to Peng-Robinson Equation. In order to perform the IAST calculation, the single-component gas absorption isotherms was fitted by the dual-site Langmuir-Freundlich (DSLFL) adsorption model, which was adopted to correlate the pure-component equilibrium data and further to evaluate the adsorption of small hydrocarbons.

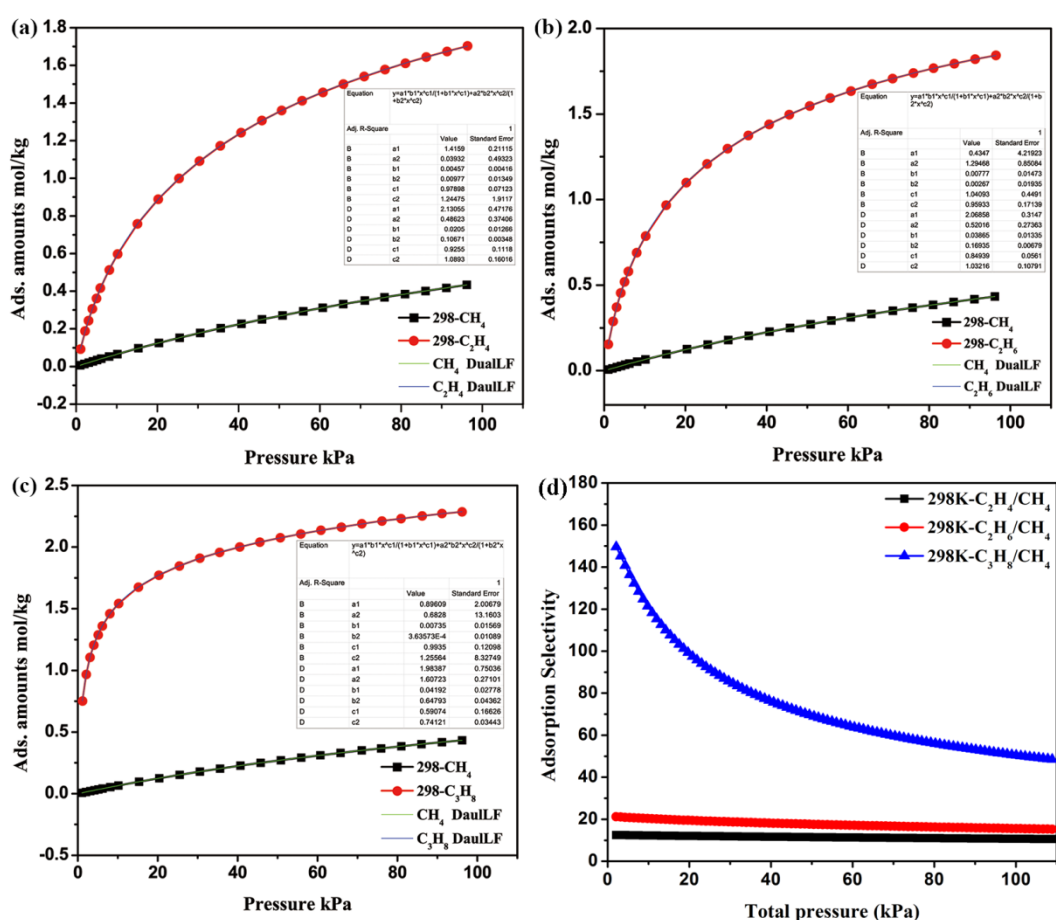

**Figure S12.** The isotherms are fitted with Langmuir–Freundlich adsorption model-based IAST theory. (a, b and c). The C<sub>2</sub>H<sub>4</sub>/CH<sub>4</sub>, C<sub>2</sub>H<sub>6</sub>/CH<sub>4</sub> and C<sub>3</sub>H<sub>8</sub>/CH<sub>4</sub> selectivity for PAF-40 at 298K and 110 kPa by IAST theory (d).

Calculation of gas selectivity for PAF-40-Mn and PAF-40-Fe is a similar procedure.

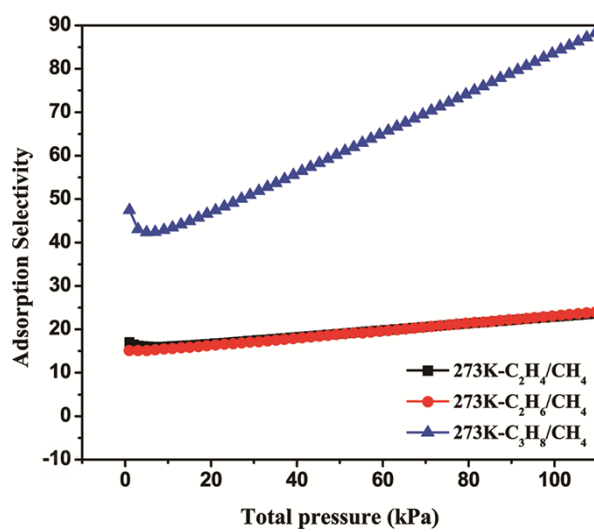

**Fig S13.** IAST-predicted adsorption selectivity of PAF-40 at 273K and 110kPa.

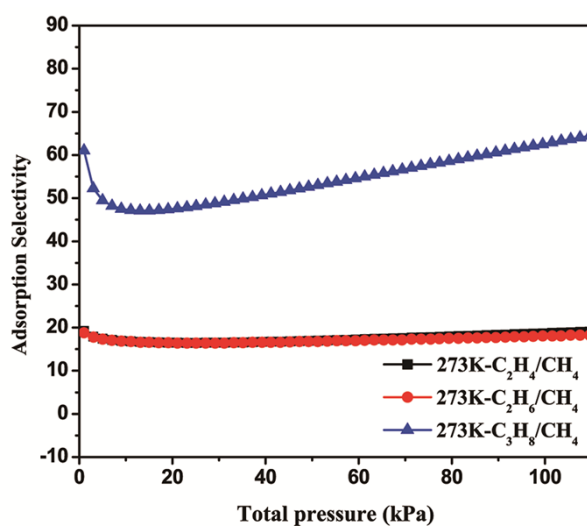

**Fig S14.** IAST-predicted adsorption selectivity of PAF-40-Fe at 273K and 110kPa.

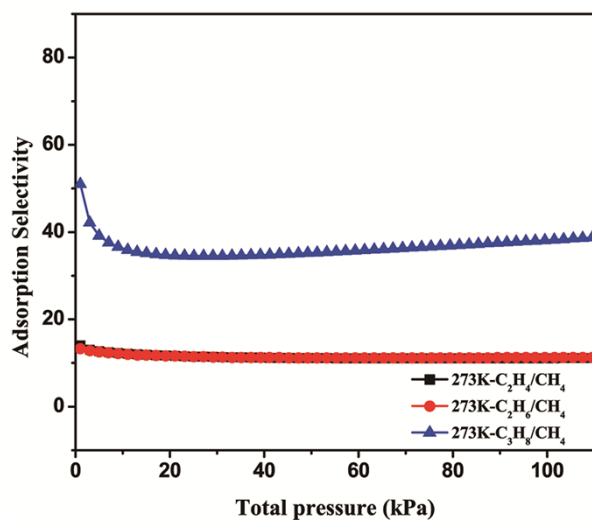

**Fig S15.** IAST-predicted adsorption selectivity of PAF-40-Mn at 273K and 110kPa.

**Table S3** Summary of small hydrocarbons adsorption in porous materials

| Materials     | T<br>[K] | P<br>[bar] | CH <sub>4</sub><br>uptake<br>[cm <sup>3</sup> /g] | C <sub>2</sub> H <sub>4</sub><br>uptake<br>[cm <sup>3</sup> /g] | C <sub>2</sub> H <sub>6</sub><br>uptake<br>[cm <sup>3</sup> /g] | C <sub>3</sub> H <sub>8</sub><br>uptake<br>[cm <sup>3</sup> /g] | Qst CH <sub>4</sub><br>[kJmol <sup>-1</sup> ] | Qst<br>C <sub>2</sub> H <sub>4</sub><br>[kJmol <sup>-1</sup> ] | QstC <sub>2</sub> H <sub>6</sub><br>[kJmol <sup>-1</sup> ] |
|---------------|----------|------------|---------------------------------------------------|-----------------------------------------------------------------|-----------------------------------------------------------------|-----------------------------------------------------------------|-----------------------------------------------|----------------------------------------------------------------|------------------------------------------------------------|
| PAF-40        | 298      | 1          | 12                                                | 40.4                                                            | 43.6                                                            | 53.6                                                            | 18.2                                          | 24.7                                                           | 36                                                         |
| PAF-40        | 273      | 1          | 18.8                                              | 50.3                                                            | 58.0                                                            | 63.0                                                            |                                               |                                                                |                                                            |
| PAF-40-<br>Fe | 298      | 1          | 13.8                                              | 51.8                                                            | 41.4                                                            | 57.9                                                            | 23.1                                          | 30                                                             | 47.8                                                       |
| PAF-40-<br>Fe | 273      | 1          | 24.1                                              | 56.1                                                            | 66.9                                                            | 51.2                                                            |                                               |                                                                |                                                            |
| PAF-40-<br>Mn | 298      | 1          | 11.0                                              | 48.8                                                            | 45.9                                                            | 56.3                                                            |                                               |                                                                |                                                            |
| PAF-40-<br>Mn | 273      | 1          | 27.0                                              | 52.3                                                            | 63.5                                                            | 60.8                                                            | 15.5                                          | 25.1                                                           | 34.8                                                       |
| PCN-14        |          |            |                                                   |                                                                 |                                                                 |                                                                 | 30                                            |                                                                |                                                            |
| UTSA-<br>35a  | 296      | 1          | 6.9                                               | 60.6                                                            | 73                                                              | 130.8                                                           |                                               |                                                                |                                                            |
| UTSA-<br>36a  |          |            |                                                   |                                                                 |                                                                 |                                                                 | 24.4                                          | 32.7                                                           | 36.1                                                       |
| UTSA-5a       | 296      | 1          | 5.2                                               |                                                                 |                                                                 |                                                                 | 9.7                                           |                                                                |                                                            |
| UTSA-5a       | 273      | 1          | 6.9                                               |                                                                 |                                                                 |                                                                 | 9.7                                           |                                                                |                                                            |
| ZJU-48a       | 296      | 1          | 7.8                                               | 39.4                                                            | 43.7                                                            |                                                                 |                                               |                                                                |                                                            |
| ZJU-48a       | 273      | 1          | 11.9                                              | 65.6                                                            | 80.6                                                            |                                                                 |                                               |                                                                |                                                            |
| COF-1         |          |            |                                                   |                                                                 |                                                                 |                                                                 | 17                                            |                                                                |                                                            |
| COF-5         |          |            |                                                   |                                                                 |                                                                 |                                                                 | 8.5                                           |                                                                |                                                            |
| HCP-3         |          |            |                                                   |                                                                 |                                                                 |                                                                 | 20.8                                          |                                                                |                                                            |

## Reference

- S1. S. Ma, D. Sun, J. M. Simmons, C. D. Collier, D. Yuan and H. Zhou, *J. Am. Chem. Soc.*, 2008, **130**, 1012-1016.
- S2. H. Xu, J. Cai, S. Xiang, Z. Zhang, C. Wu, X. Rao, Y. Cui, Y. Yang, R. Krishna, B. Chen and G. Qian, *Journal of Materials Chemistry A*, 2013, **1**, 9916-9921.
- S3. Y. He, R. Krishna and B. Chen, *Energy & Environmental Science*, 2012, **5**, 9107-9120.
- S4. Y. He, Z. Zhang, S. Xiang, F. R. Fronczek, R. Krishna and B. Chen, *Chemistry-a European Journal*, 2012, **18**, 613-619.
- S5. Y. He, W. Zhou, R. Krishna and B. Chen, *Chemical Communications*, 2012, **48**, 11813-11831.
- S6. M. C. Das, H. Xu, S. Xiang, Z. Zhang, H. D. Arman, G. Qian and B. Chen, *Chemistry-a European Journal*, 2011, **17**, 7817-7822.
- S7. Y. He, Z. Zhang, S. Xiang, F. R. Fronczek, R. Krishna and B. Chen, *Chemical Communications*, 2012, **48**, 6493-6495.
- S8. T. A. Makal, J. Li, W. Lu and H. Zhou, *chem Soc Rev*, 2012, **41**, 7761-7779.
